# Supplementary material
Source: PubMed Central journal article supplement (PMC11115031)

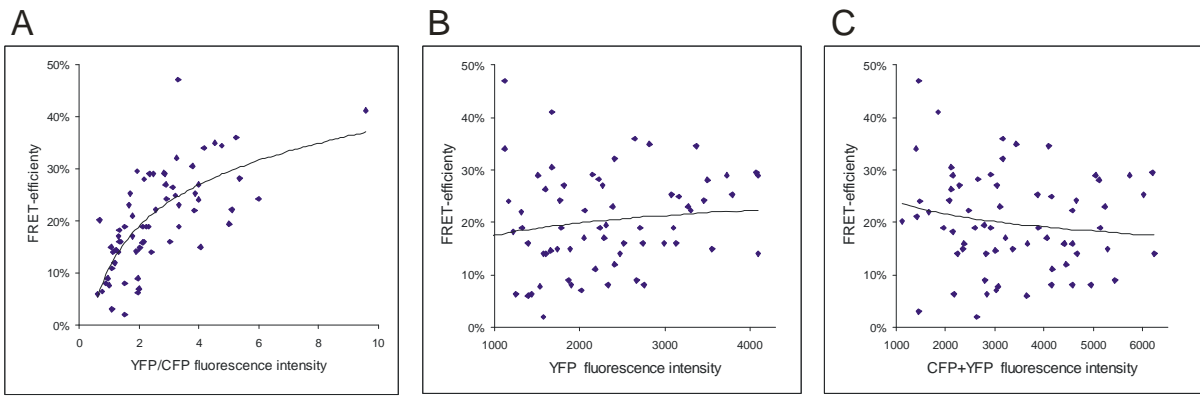

**Fig. S1**

Supplement: 18_2011_680_MOESM1_ESM.pdf [file 18_2011_680_MOESM1_ESM.pdf]

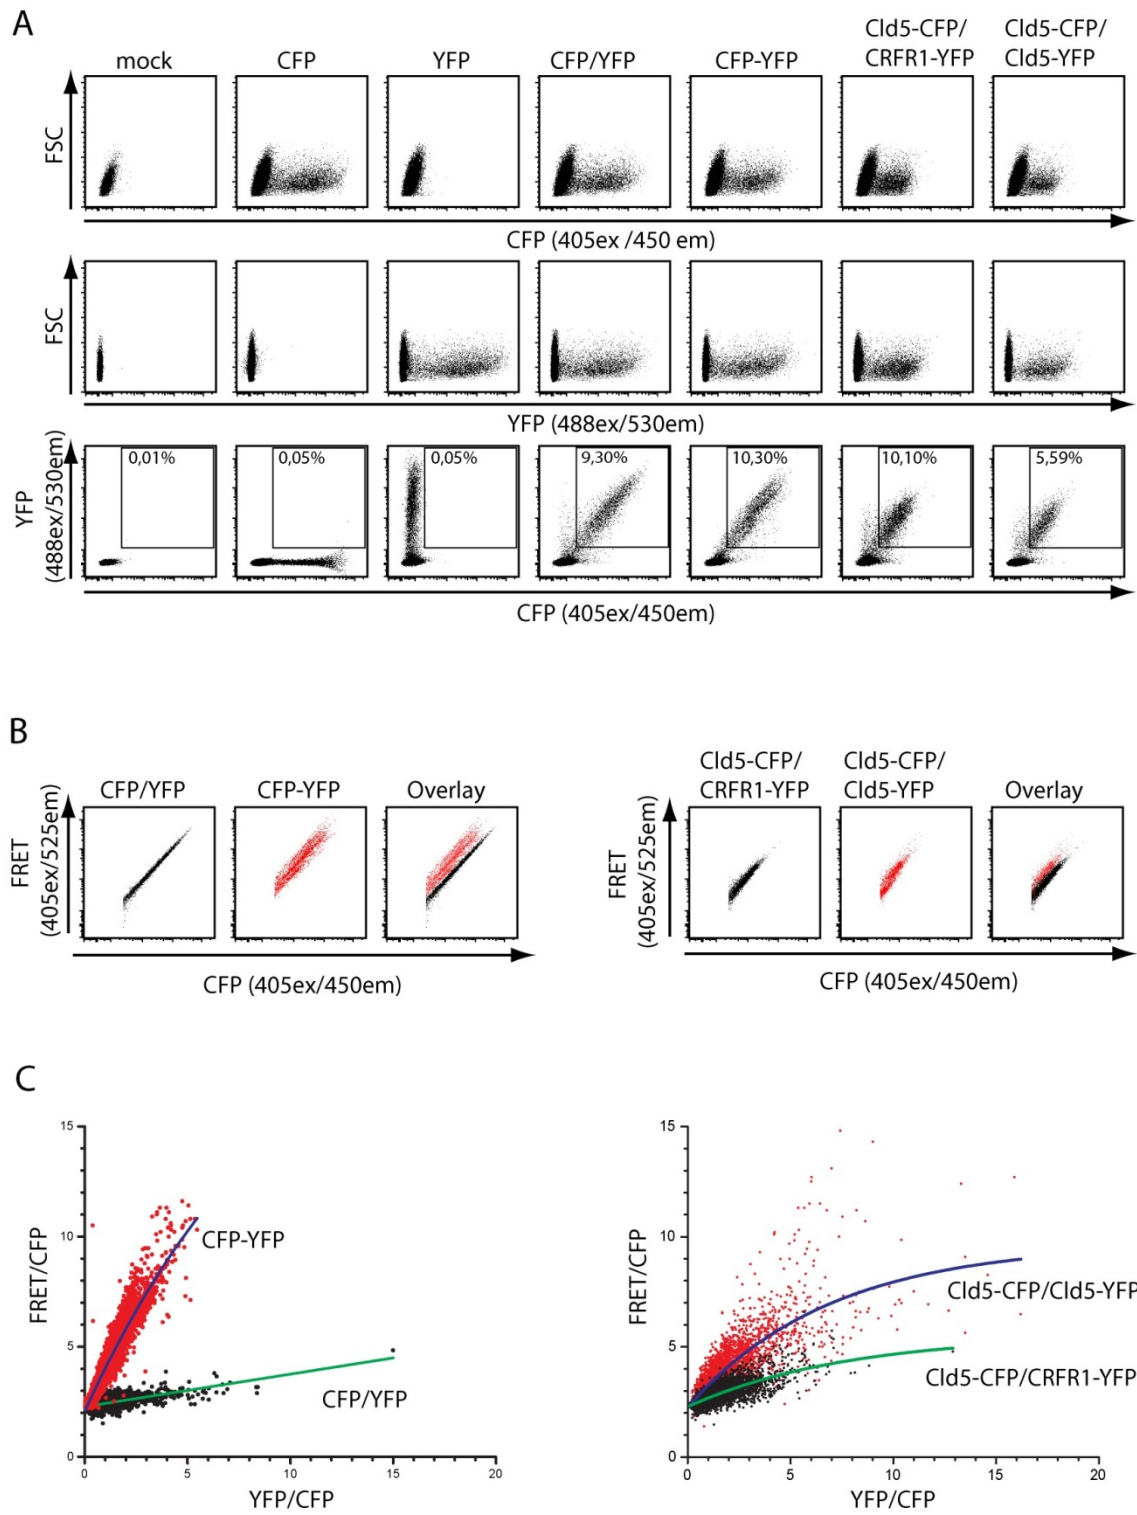

**Fig. S2**

Supplement: 18_2011_680_MOESM2_ESM.pdf [file 18_2011_680_MOESM2_ESM.pdf]

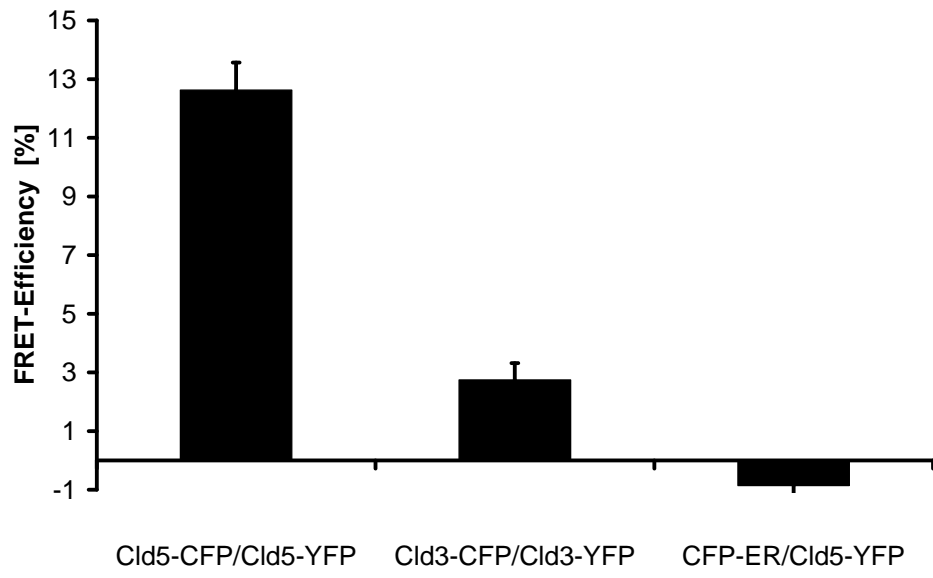

Fig. S3

Supplement: 18_2011_680_MOESM3_ESM.pdf [file 18_2011_680_MOESM3_ESM.pdf]

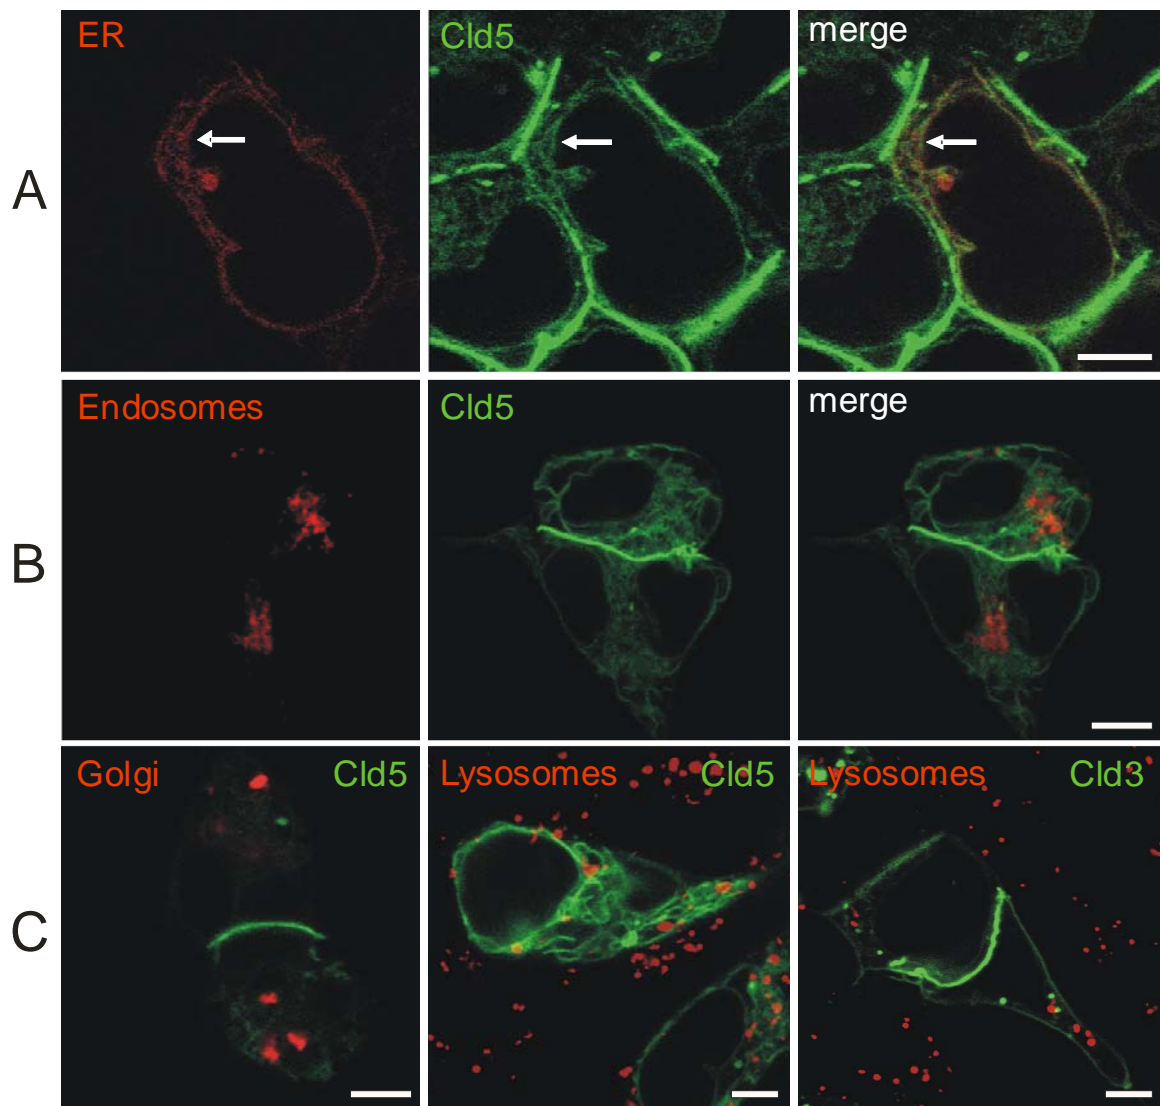

Fig. S4

Supplement: 18_2011_680_MOESM4_ESM.pdf [file 18_2011_680_MOESM4_ESM.pdf]

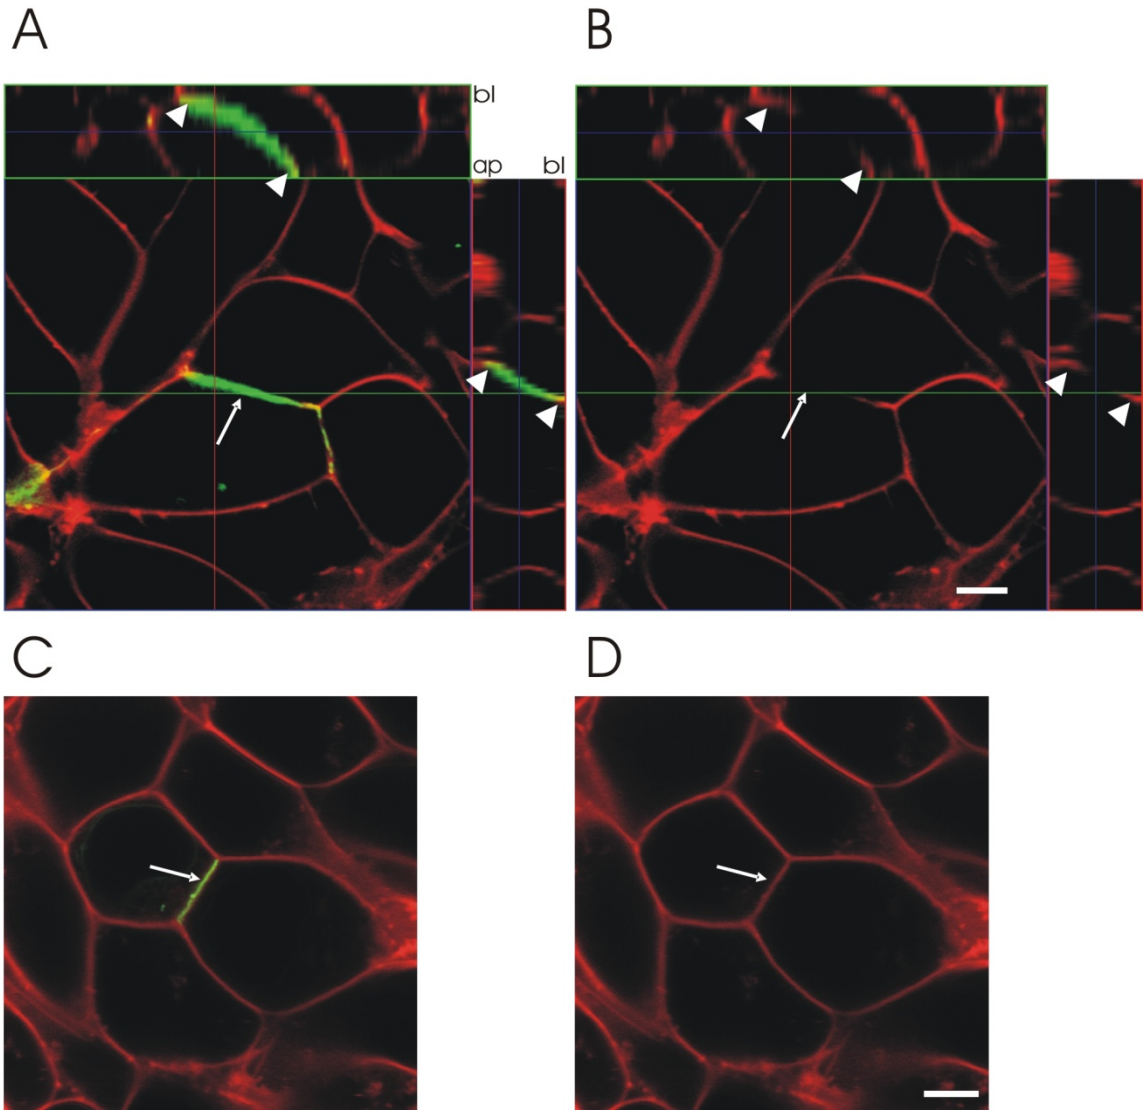

Fig. S5

Supplement: 18_2011_680_MOESM5_ESM.pdf [file 18_2011_680_MOESM5_ESM.pdf]
